# Supplementary material for: Nuclear eIF4E Stimulates 3′-End Cleavage of Target RNAs
Source: PubMed Central journal article supplement — Cell Rep. Author manuscript; Available in PMC 2019 Jul 29. (PMC6661904; doi:10.1016/j.celrep.2019.04.008), 2019-04-30
Supplement: NIHMS1528290-supplement-1.pdf [file NIHMS1528290-supplement-1.pdf]

**Cell Reports, Volume 27**

**Supplemental Information**

**Nuclear eIF4E Stimulates 3'-End Cleavage  
of Target RNAs**

**Margaret Rose Davis, Mildred Delaleau, and Katherine L.B. Borden**

**Cell Reports, Volume 27**

**Supplemental Information**

**Nuclear eIF4E Stimulates 3'-End Cleavage  
of Target RNAs**

**Margaret Rose Davis, Mildred Delaleau, and Katherine L.B. Borden**

**Supplemental Information**

**Supplemental Figure Legends and Table**

**A**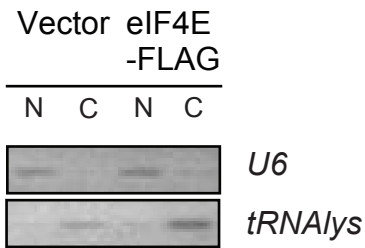**B**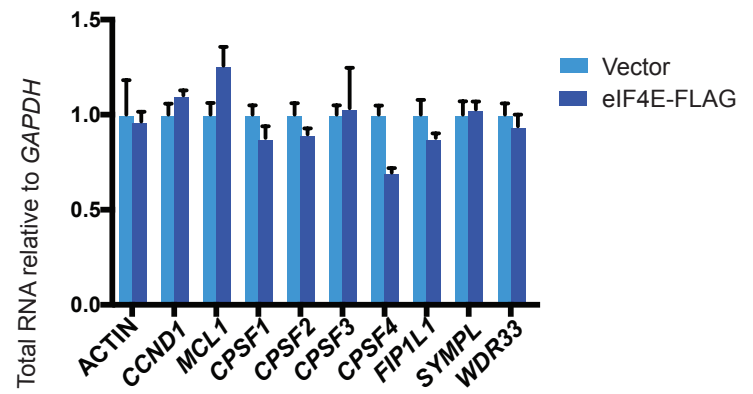**C**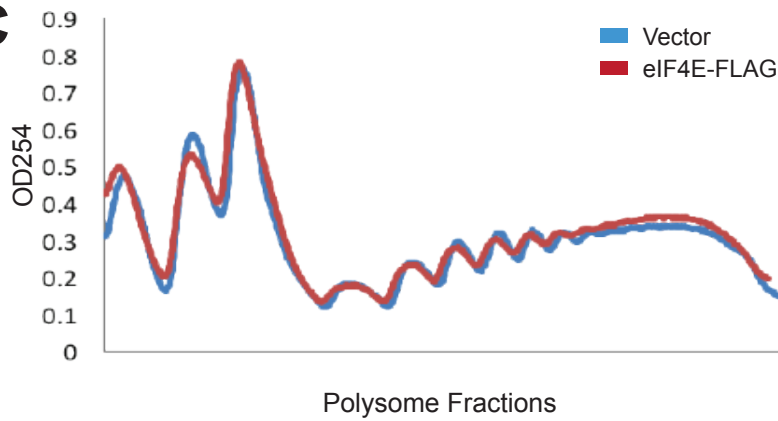**D**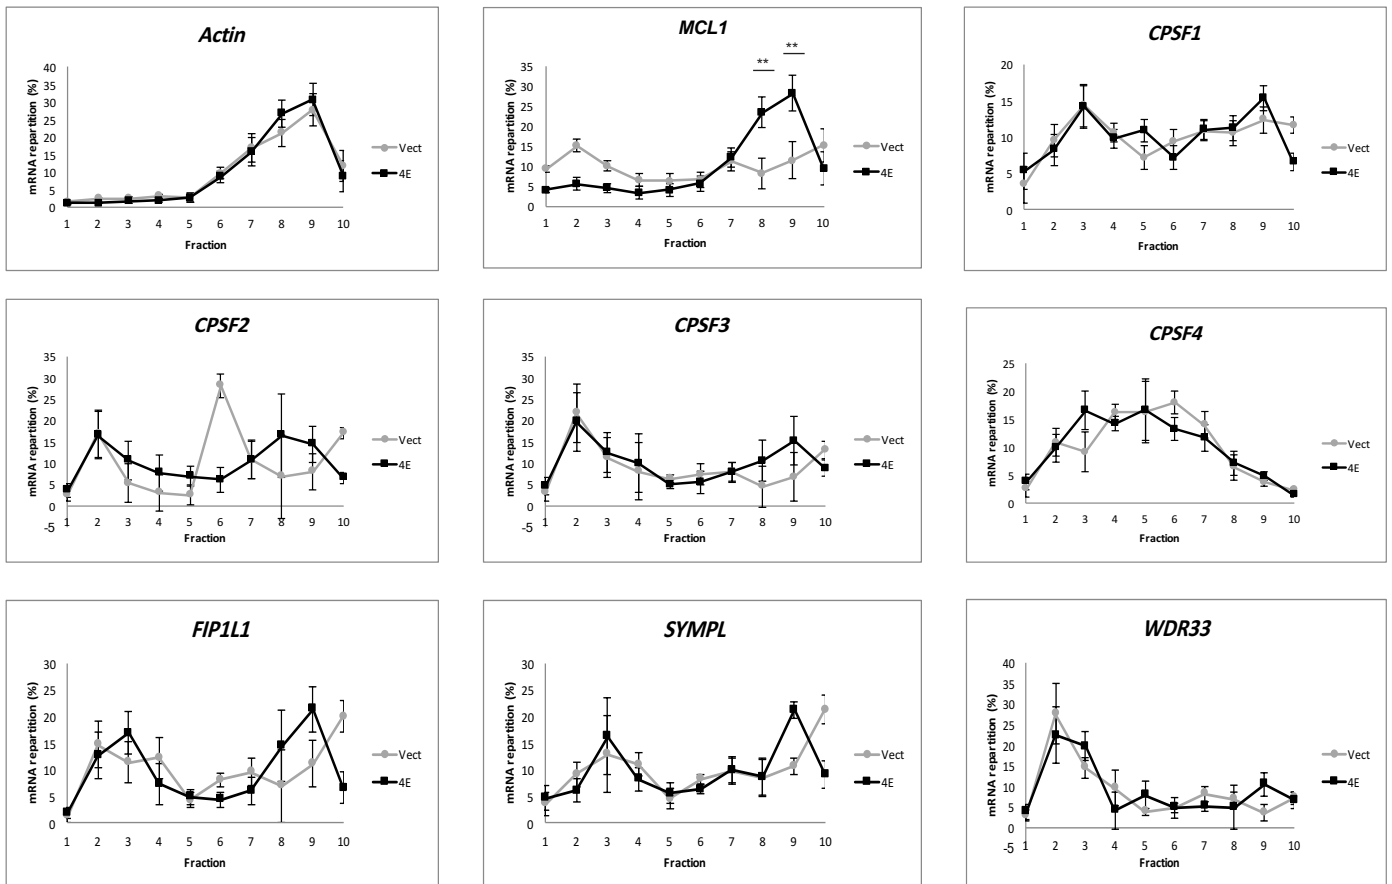**Supplemental Figure 1**

**Supplemental Figure 1. eIF4E does not modulate polysomal loading of CPA machinery related to Figure 1.**

**A.** Fractionation control for eIF4E-FLAG or vector controls for Figure 1. U6 is a marker of the nuclear fraction (N) and tRNA<sup>lys</sup> is a marker for the cytoplasmic fraction (C) as detected by semi-quantitative PCR. **B.** Total RNA levels for indicated RNA in vector or eIF4E-FLAG cells detected by RT-qPCR and normalized to *GAPDH*. **C.** Polysome profile (Fraction 1-10) is unchanged by eIF4E overexpression, as expected. OD<sub>254</sub> across the profile. **D.** Polysome analysis for indicated RNAs across fractions. *MCL1*, a positive control for both export and translation efficiency, translation efficiency is increased. The remaining transcripts do not show a significant increase in eIF4E overexpressing cells. Means+/-standard deviation are shown. Experiments are from 4 biological replicates and RNAs detected by RT-qPCR normalized to Vector or eIF4E-FLAG input.

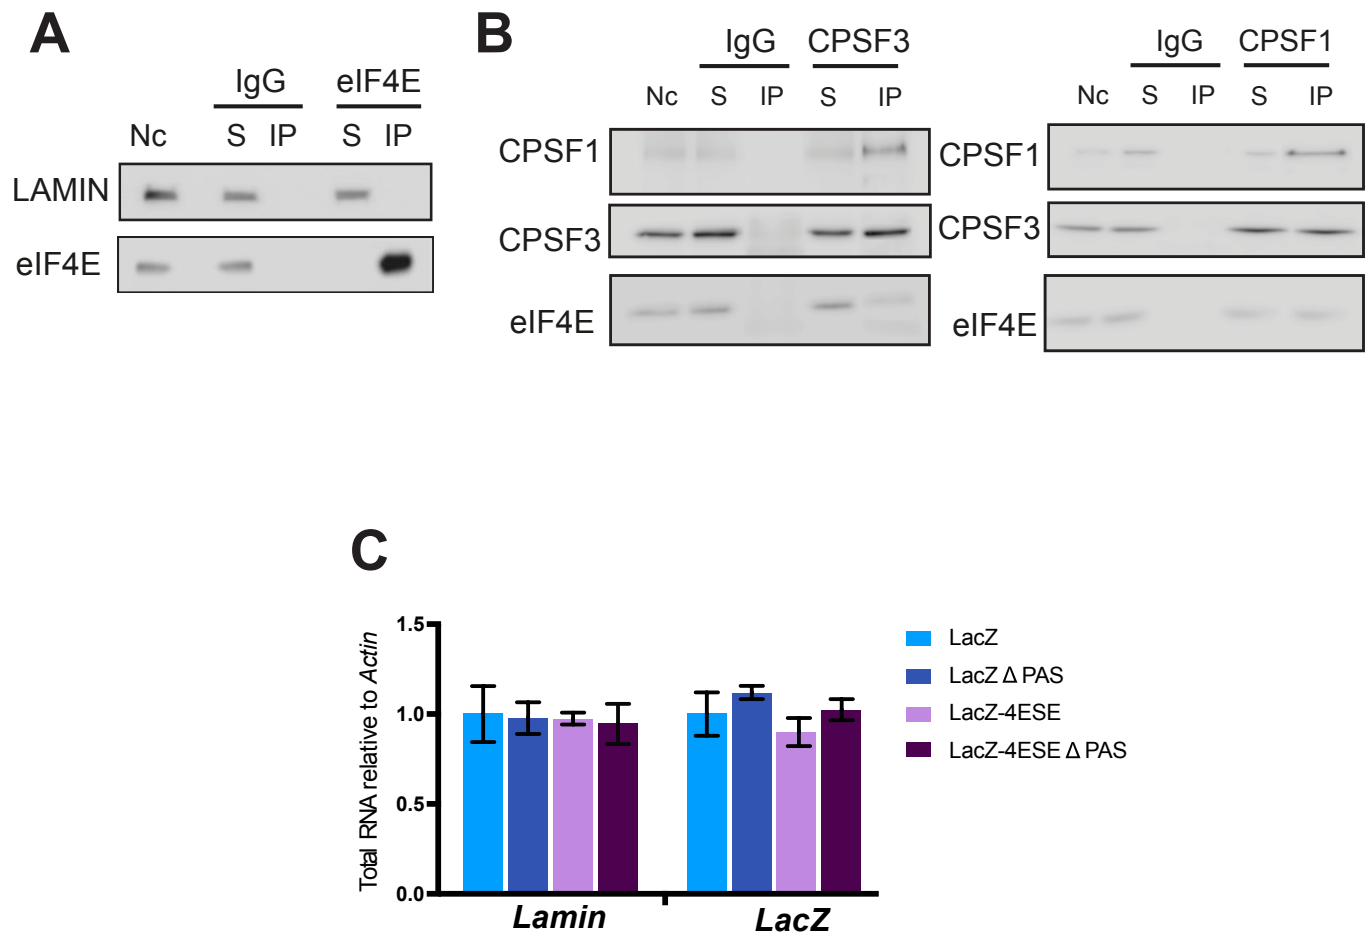

**Supplemental Figure 2. eIF4E interacts with CPSF3 but not LAMIN related to Figure 2.** **A.** eIF4E does not immunoprecipitate with negative control, LAMIN. Lysates used are the same as in Figure 2, but ran on a different gel. **B.** Endogenous eIF4E physically associates with CPSF3 and CPSF1 in U2Os cells. Nc, nuclear lysate, S, supernatant. **C.** Total RNA for indicated LacZ constructs in eIF4E-FLAG cells. *Lamin* RNA serves as a loading control. RNAs were detected by RT-qPCR, and values are means $\pm$ standard deviations. Experiments were done in 3 biological replicates.

## Supplemental Figure 2

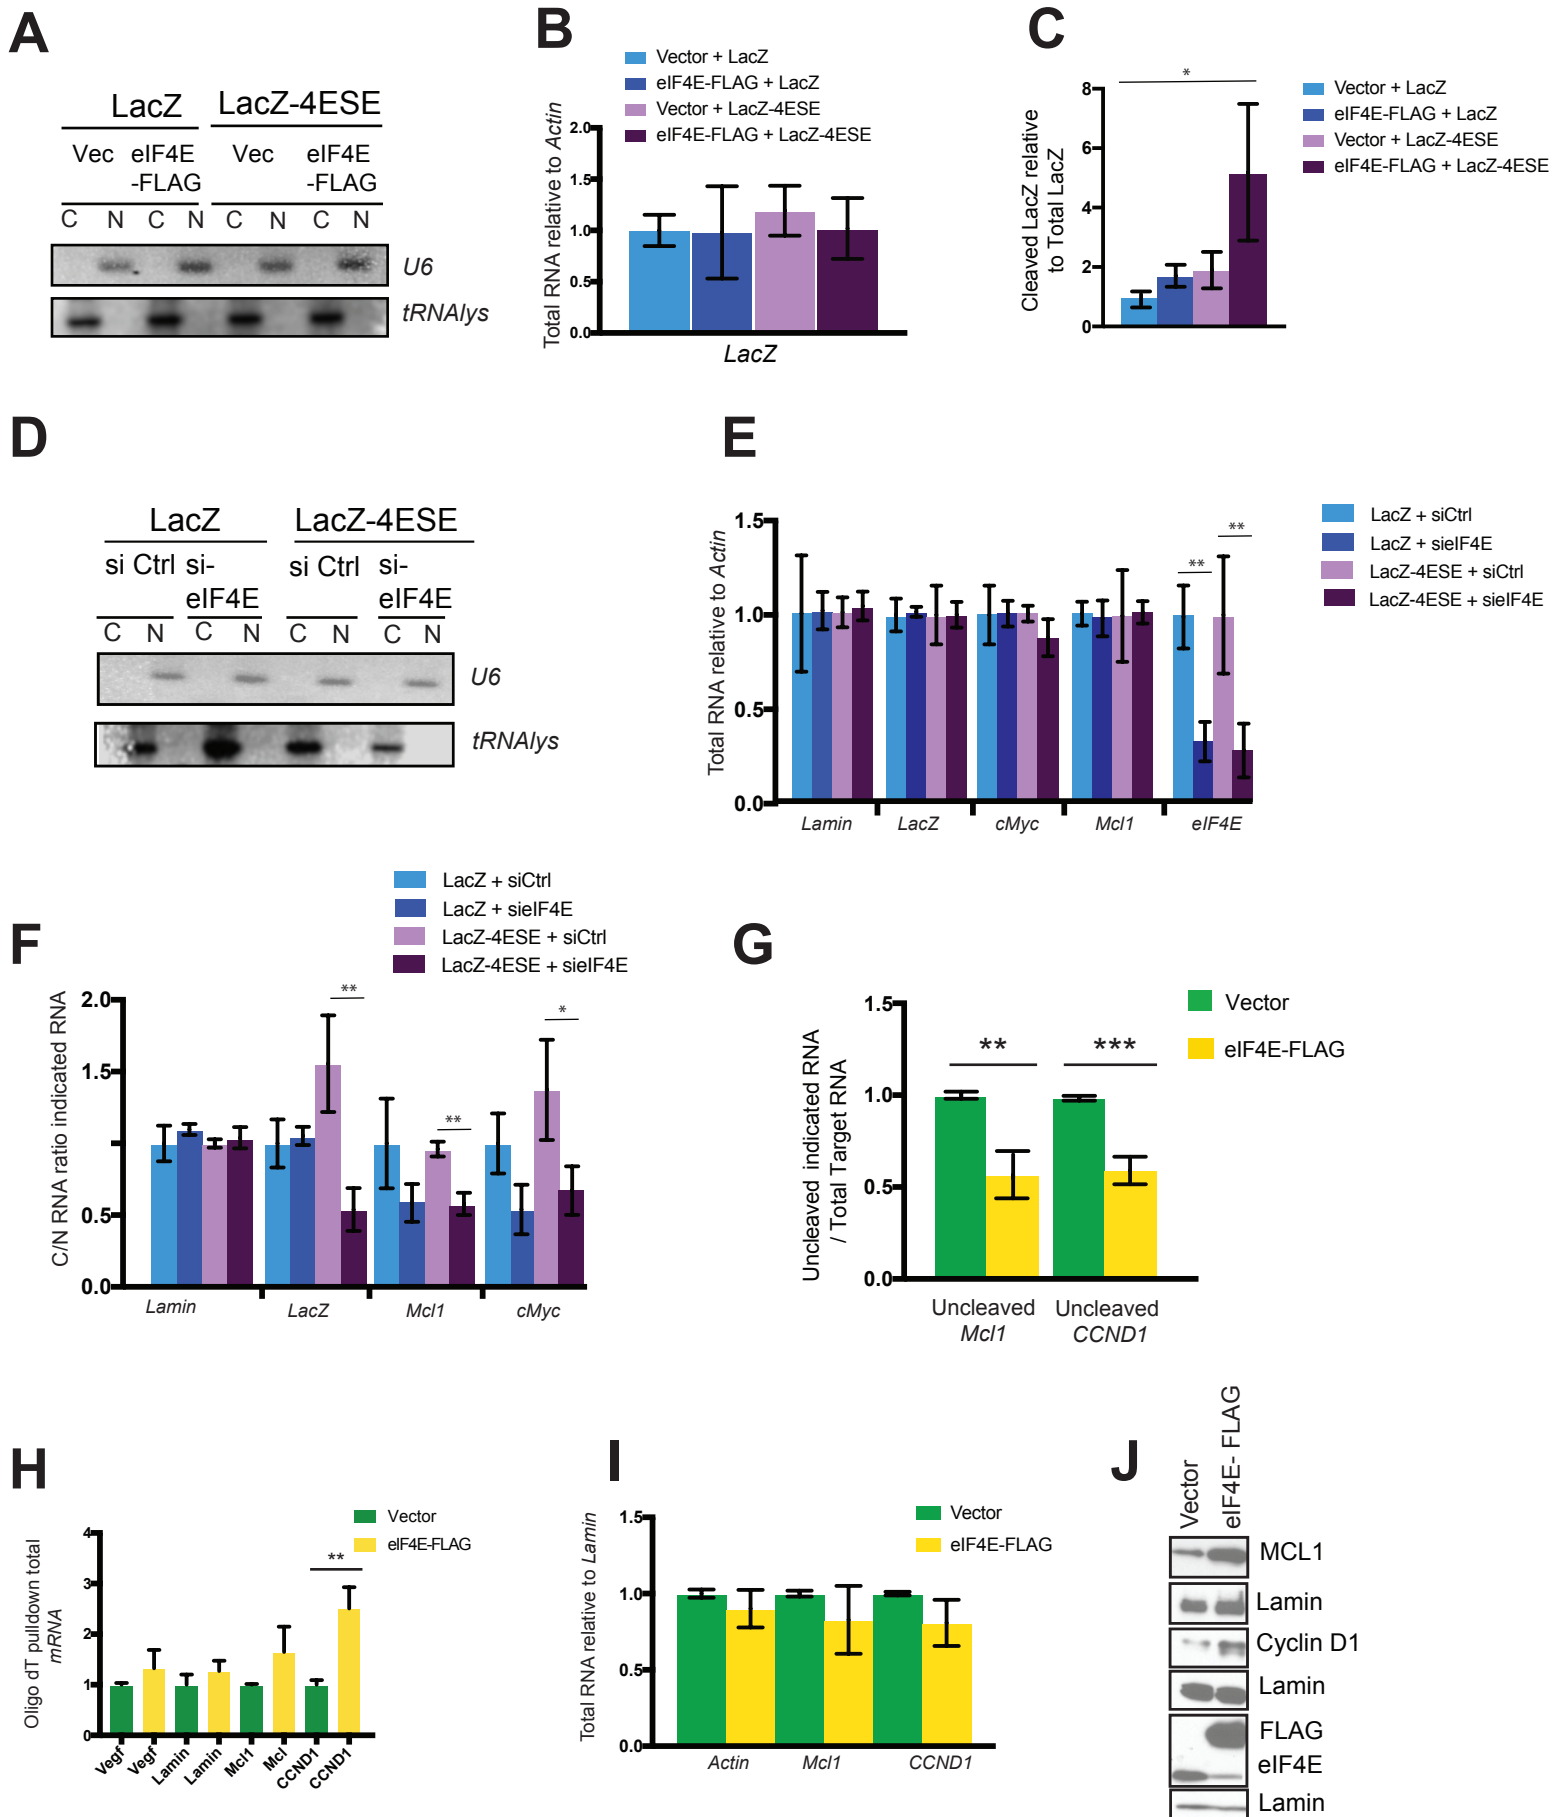

Supplemental Figure 3

**Supplemental Figure 3. Endogenous RNA cleavage and controls related to Figure 3.** **A.** Fractionation controls for Figure 3 as described above. **B.** Total RNA levels for LacZ transcripts indicated from RT-qPCR. **C.** Cleavage assay using primers to detect cleaved and polyadenylated forms of LacZ. More cleaved RNA is observed in eIF4E overexpressing cells for the LacZ-4ESE construct. **D.** Fractionation controls for RNAi to eIF4E experiments in Figure 3. **E.** Total RNAs for LacZ constructs and on ctrl RNAs from Figure 3 from RT-qPCR assays. eIF4E RNA levels are the only significant change, whereby they were reduced by siRNA to eIF4E as expected. **F.** RNA export assay monitoring cytoplasmic (C) to nuclear (N) ratio on indicated RNAs as a function of *siEIF4E* relative to siCtrl using RT-qPCR. **G.** Uncleaved/total endogenous *MCL1* or *CCND1* (cyclin D1) transcripts measured in nuclear lysates from vector or eIF4E-FLAG U2Os cells. **H.** Oligo dT RNA pulldown from total cell lysates to assess fraction of RNA cleaved and RNA levels using exonic primers **(I).** **J.** Corresponding western blots for Mcl1 and cyclin D1. For RT-qPCR experiments, values are means +/-SD with P-values as follows: \* P<0.05, \*\* P<0.01, \*\*\* P<0.001, \*\*\*\* P<0.0001. Experiments were 5 (C), 3 (B, E, F, G, I) or 2 (H) biological replicates each carried out in triplicate. Representative fractionation controls are shown.



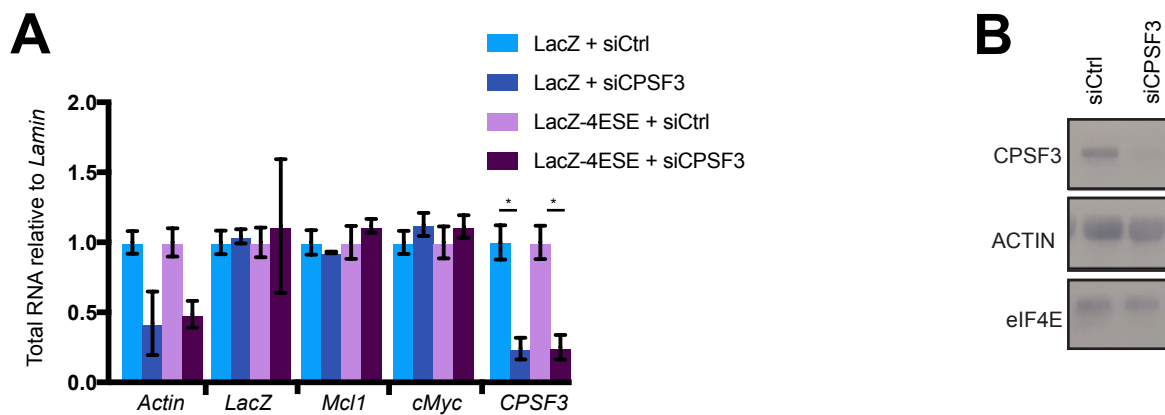

**Supplemental Figure 4. Controls related to Figure 4.** **A.** Analysis of total levels of RNAs indicated as a function of knockdown of *CPSF3* in eIF4E-FLAG U2Os cells. siCtrl indicates RNAi control. Means +/- standard deviations are shown. **B.** Western blot confirms knockdown of *CPSF3*, Representative blot from 3 biological replicates. ACTIN is shown as a loading control. RT-qPCR experiments were carried out in 3 biological replicates, each carried out in triplicate. Values are means +/-SD with P-values as follows: \* P<0.05, \*\* P<0.01, \*\*\* P<0.001, \*\*\*\* P<0.0001.

## Supplemental Figure 4

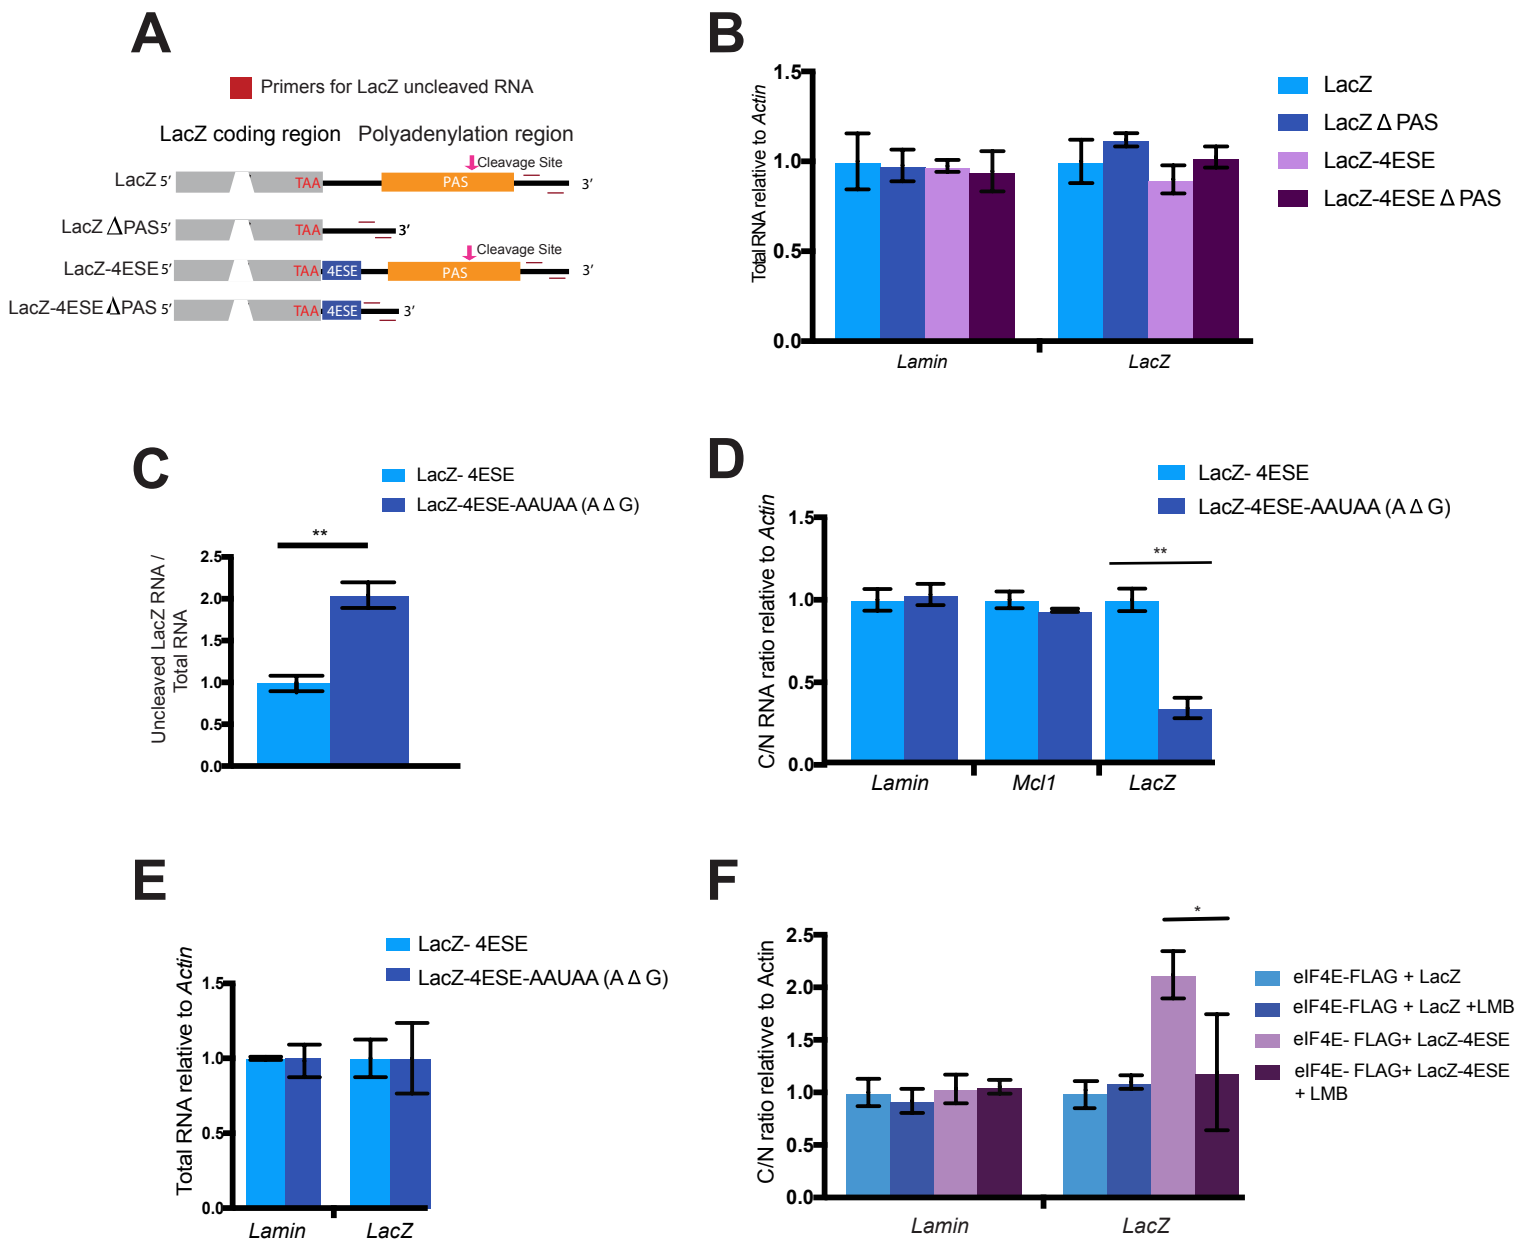

**Supplemental Figure 5. Controls related to Figure 5.** **A.** Diagram of constructs used, not drawn to scale. **B.** Total RNA levels for *Lamin*, *LacZ* and *LacZ-4ESE* RNAs as a function of  $\Delta$ PAS. **C.** Effects of point mutations in the PAS site (AAUAAA to AAUAAG) on cleavage. Uncleaved wildtype or mutant *LacZ-4ESE* were measured by RT-qPCR and elevated levels of uncleaved RNA indicated that mutation reduced PAS cleavage. **D.** RNA export assay as a function of PAS point mutation monitoring cytoplasmic (C) to nuclear (N) ratio relative to controls using RT-qPCR. **E.** Total RNA levels for the wildtype and point mutations show no differences by RT-qPCR. **F.** RNA export assay as a function of LMB treatment monitoring cytoplasmic (C) to nuclear (N) ratio relative to controls using RT-qPCR. Experiments were carried out in 3 biological replicates, each in triplicate. Values are means  $\pm$  SD with P-values as follows: \*  $P < 0.05$ , \*\*  $P < 0.01$ , \*\*\*  $P < 0.001$ , \*\*\*\*  $P < 0.0001$ .

## Supplemental Figure 5

| Name                                   | Sequence                                                                       |
|----------------------------------------|--------------------------------------------------------------------------------|
| <i>I8S</i>                             | FWD 5' CTGAGAAACGGCTACCCACATC 3'<br>RVS 5' GCCTCGAAAGAGTCCTGTCTTG 3'           |
| <i>LacZ uncleaved Fwd</i>              | 5'CCCGTGCCTTCCTTGAC3'                                                          |
| <i>LacZ uncleaved Rvs</i>              | 5'ATGACACCTACTCAGACAATG3'                                                      |
| <i>LacZ cleavage Rvs</i>               | 5'TTTTTTTTTTTTGGCGATGCAA3'                                                     |
| <i>LacZ FWD O/H primers:</i>           | 5'TCGTCGGCAGCGTCAGATGTGTATAAGAGACAGCC<br>G TGCCTTCCTTGACCCTG 3'                |
| <i>LacZ RVS Uncleaved O/H primers:</i> | 5'GTCTCGTGGGCTCGGAGATGTGTATAAGAGACAGT<br>AGAATGACACCTACTCAGACAA3'              |
| <i>LacZ RVS cleaved O/H primers:</i>   | 5' GTCTCGTGGGCTCGGAGATGTGTA<br>TAAGAGACAGTTTTTTTTTTTGGCGATGCAATTTTC 3'         |
| <i>LacZ total FWD:</i>                 | 5' ACAGCAAATGGGTCTGGGATCTGTA3' (Invitrogen)                                    |
| <i>LacZ total RVS</i>                  | RVS 5' TGTGCTGCAAGGCGATTAAGTTGG 3'<br>(Invitrogen)                             |
| <i>Actin B</i>                         | FWD 5' TCTCTCTAAGGAGAATGGC 3'<br>RVS 5'CATTTTTTAAGGTGTGCACTT 3'                |
| <i>CCND1</i>                           | FWD 5' CACTTCCTCTCCAAAATGCCA 3'<br>RVS 5' CCTGGCGCAGGCTTGACTC 3'               |
| <i>CPSF1</i>                           | FWD 5' CCTCACTGGCTCTTGGTGA 3'<br>RVS 5' ATGGGGCATCATAGGACAGG 3'                |
| <i>CPSF2</i>                           | FWD 5' GGCACCTCCTAAATAATGTCAGTTACAA 3'<br>RVS 5' TCAATTTATCACTCATCCATTCTACC 3' |
| <i>CPSF3</i>                           | FWD 5' ACTAGCCAAGGTTATGGGATTT 3'<br>RVS 5' AGGTCGCAAGGAGAAAAGTATG 3'           |
| <i>CPSF4</i>                           | FWD 5' CGGCACACACGGAGAGTC 3'<br>RVS 5' CTTTGCTGGAGGCTGTGTCT 3'                 |
| <i>eIF4E</i>                           | FWD 5' AGGAGGTTGCTAACCCAGAACACT 3'<br>RVS 5' AAAGTGAGTAGTCACAGCCAGGCA3'        |

|                                                   |                                                                                                                            |
|---------------------------------------------------|----------------------------------------------------------------------------------------------------------------------------|
| <i>FIP1L1</i>                                     | FWD 5' CGCCTAGTGTCGGAGCTG 3'<br>RVS 5' GGTCTTTGCCAAATCACTG 3'                                                              |
| <i>GAPDH</i>                                      | FWD 5' ACCACAGTCCATGCCATCAC 3'<br>RVS 5' TCCACCACCCTGTTGCTGTA 3'                                                           |
| <i>LacZ total</i>                                 | FWD 5' ACAGCAAATGGGTCGGGATCTGTA3'<br>RVS 5' TGTGCTGCAAGGCGATTAAGTTGG 3'                                                    |
| <i>LacZ <math>\Delta</math> PAS<br/>uncleaved</i> | FWD 5' CCTGTAGCGGGCGCATTAAG 3'<br>RVS 5' GCGAGAAAGGAAGGGAAGAAAG 3'                                                         |
| <i>LacZ AAUAAG</i>                                | FWD:<br>5' CCACTGTCCTTTCTAATAAGATGAGGAAATTGCAT<br>CGCAT 3'<br>RVS:<br>5' ATGCGATGCAATTTCTCATCTTATTAGGAAAGGA<br>CAGTGG 3'   |
| <i>Lamin</i>                                      | FWD 5' GCAAGACCCTTGACTCAGTAG 3'<br>RVS 5' GTCACCCTCCTTCTTGGTATTG 3'                                                        |
| <i>MCL1</i>                                       | FWD 5' ACTTCTCACTTCCGCTTCCTTCCA 3'<br>RVS 5' TTTGAGGCCAAACATTGCCAGTCG 3'                                                   |
| siRNA duplex _Luciferase                          | Sense: CACGUACGCGGAAUACUUCGAAAUG<br>Antisense:<br>CAUUUCGAAGUAUUCGCGUACGUGUU                                               |
| siRNA_duplex_ <i>eIF4E</i> (Human)                | Sense: CUGCGUCAAGCAAUCGAGAUUUGGG<br>Antisense: CCCAAAUCUCGAUUGCUUGACGCAGUC                                                 |
| siRNA duplex _ <i>CPSF3</i>                       | HSC.RNAI.N016207.12.1 (catalogue number)<br>Sense: CCCUUCUAAUGAUAUGUAUGCAGAT<br>Antisense:<br>AUCUGCAUACAUAUCAUUAAGAAGGGUU |

**Table S1. Oligonucleotides used in this study related to the STAR methods. Unless noted, these were obtained from Integrated DNA Technologies.**
